# Supplementary material for: Two novel nitrogen-rich metal–organic nanotubes: syntheses, structures and selective adsorption toward rare earth ions
Source: Royal Society of Chemistry journal article supplement (doi:10.1039/d3dt02606j), 2023-01-01
Supplement: d3dt02606j1.pdf [file d3dt02606j1.pdf]

## Two Novel Nitrogen-rich Metal-organic Nanotubes: Syntheses, Structures and Selective Adsorption toward Rare Earth

Minli Zhong<sup>1</sup>, Siyao Xia<sup>1</sup>, Sanmei Liu, Caiju Jin, Shengjun Deng\*, Weiming Xiao, Shunmin Ding, Chao Chen\*

*Key laboratory of Jiangxi Province for Environment and Energy Catalysis, School of Chemistry and Chemical Engineering, Nanchang University, Nanchang, 330031, P. R. China*

<sup>1</sup>The first two authors contributed equally

\*To whom correspondence should be addressed. E-mail: Shengjun Deng: [dshj1028@126.com](mailto:dshj1028@126.com); Chao Chen [chaochen@ncu.edu.cn](mailto:chaochen@ncu.edu.cn)

### Contents

- 1 Experimental section.
- 2 Fig. S1. TGA curves of **NCD-166** and **NCD-167**.
- 3 Fig. S2. PXRD patterns of **NCD-166** (a) and **NCD-167** (b) soaked in different pH aqueous solutions for 24 h.
- 4 Fig. S3. The fitting curves of Weber-Morris intra-particle diffusion models of Eu<sup>3+</sup> adsorption.
- 5 Fig. S4. Solid state UV-vis spectra of **NCD-167** before and after Eu<sup>3+</sup> adsorption.
- 6 Fig. S5. The coordination environment of the organic ligands and Zn<sup>2+</sup> ions of **NCD-167**.
- 7 Fig. S6. Crystal photographs of **NCD-166** (a) and (b) **NCD-167**.
- 8 Fig. S7. PXRD pattern of **NCD-167** before and after Eu<sup>3+</sup> adsorption.
9. Fig. S8. (a) The recycling performance of **NCD-166** and **NCD-167**; (b) PXRD pattern of **NCD-166** and **NCD-167** before and after recycling.
- 10 Table S1. Crystal Data and structure refinement for **NCD-166** and **NCD-167**.
- 11 Table S2. Comparison of adsorption capacity of different adsorbents for Eu<sup>3+</sup>.
- 12 Table S3. The fitting results by the Weber-Morris intra-particle diffusion model of Eu<sup>3+</sup> onto **NCD-167**.
- 13 References

## 1 Experimental section

### 1.1 Characterization

The PXRD patterns for the samples were taken on a flat plate in the  $2\theta$  range 4–50°, using a Puxi DX-3 X-ray powder diffractometer, equipped with Cu K $\alpha$  ( $\lambda = 1.5418 \text{ \AA}$ ) radiation. The thermogravimetric analysis (TGA) was performed under a nitrogen atmosphere with the heating rate of 10 °C min<sup>-1</sup> with METTLER TPLEDO DSC+ thermal analyzer. Fourier transform infrared (FT-IR) spectra of the samples were measured on a Agilent Cary 630 infrared spectrum apparatus using the KBr sheeting method in the range of 4000–400 cm<sup>-1</sup>. The concentration of metal ions before and after adsorption were determined by Inductively Coupled Plasma Optical Emission Spectrometry (ICP-OES, Agilent, 5100). pH meter (INESA PHS-3C) was used to measure the pH of solutions and Zetasizer Nano series (Nano-ZS90) was used to measure the surface charge of the samples. The Perkin-Elmer 240 analyzer was applied to determine the contents of nitrogen, hydrogen and carbon. The Agilent Cary 60 spectrophotometer was applied to record the Ultraviolet–visible spectra. X-ray photoelectron spectroscopy (XPS) was conducted on a Thermo Scientific™ K-Alpha™+ spectrometer equipped with a monochromatic Al K $\alpha$  X-ray source (1486.6 eV) operating at 100 W. Samples were analysed under vacuum ( $P < 10^{-8}$  mbar) with a pass energy of 150 eV (survey scans) or 50 eV (high-resolution scans). All peaks would be calibrated with C1s peak binding energy at 284.8 eV for adventitious carbon. Single-crystal diffraction data was collected on a CCD area detector diffractometer equipped with Mo K $\alpha$  radiation ( $\lambda = 0.71073 \text{ \AA}$ ). The structures were solved by direct methods and refined by full-matrix least-squares with Olex2 programs.<sup>1</sup> The disordered solvent molecules were removed by the SQUEEZE program.<sup>2</sup> CCDC 2206369 and 2206383 for NCD-166 and NCD-167 can be obtained free of charge from [http://www.ccdc.cam.ac.uk/data\\_request/cif](http://www.ccdc.cam.ac.uk/data_request/cif) or by emailing data request@ccdc.cam.ac.uk, or by contacting The Cambridge Crystallographic Data Centre, 12 Union Road, Cambridge CB2 1EZ, UK; fax: +44 1223 336033.

### 1.2 Calculations of Adsorption Kinetics

The curves were fitted using pseudo-first-order model (Eq. S1), pseudo-second-order model (Eq. S2) and Weber-Morris intra-particle diffusion model (Eq. S3).

$$\ln(q_e - q_t) = \ln(q_e) - k_1 t \quad (1)$$

$$t/q_t = 1/(k_2 \times q_e^2) + t/q_e \quad (2)$$

$$q_t = kt^{0.5} + C \quad (3)$$

where  $q_e$  and  $q_t$  (mg g<sup>-1</sup>) were the adsorption capacity at equilibrium and a specific time, respectively.  $k_1$ ,  $k_2$  (min<sup>-1</sup>)

and  $k$  ( $\text{mg g}^{-1} \text{min}^{0.5}$ ) respectively represented the rate constant of pseudo-first-order model, pseudo-second-order model, and Weber-Morris models.

### 1.3 Calculations of Adsorption Isotherms

The adsorption isotherms were fitted using the Langmuir model (Eq. S4), and Freundlich model (Eq. S5)

$$C_e/q_e = 1/(K_L \times q_m) + C_e/q_m \quad (4)$$

$$\ln q_e = \ln K_F + (1/n) \ln C_e \quad (5)$$

### 1.4 Calculations of Selectivity Adsorption

The selectivity towards  $\text{Eu}^{3+}$  was determined through the calculation of the selectivity ( $S_{\text{Eu}}$ , %, Eq. S6).

$$S_{\text{Eu}} = \frac{q(\text{Eu})}{q(\text{all ions})} \times 100 \quad \dots\dots\dots (7)$$

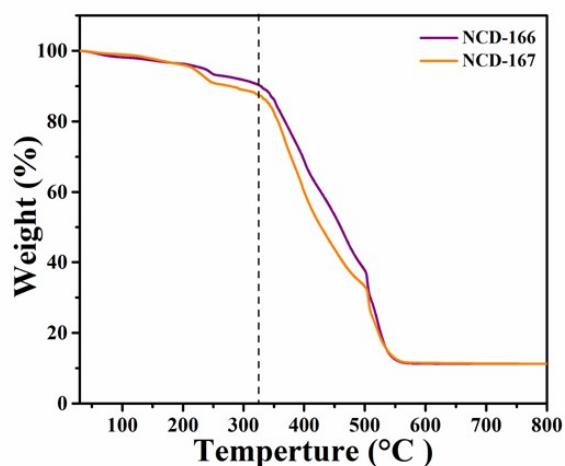

Fig. S1. TGA curves of NCD-166 and NCD-167.

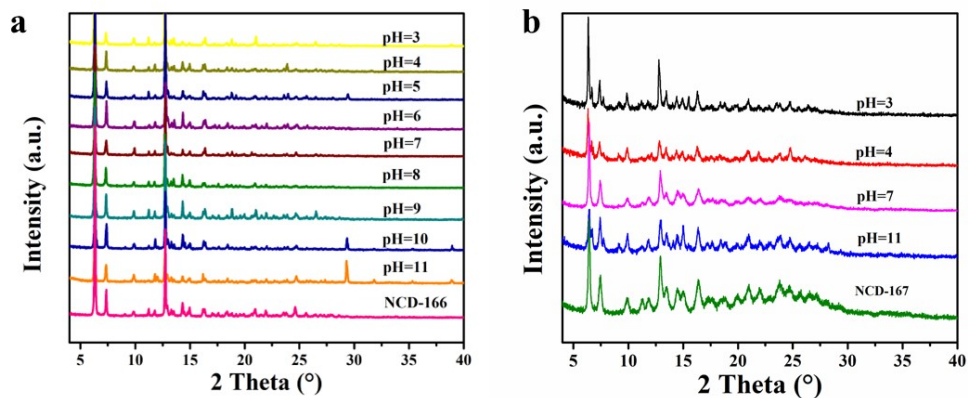

Fig. S2. PXRD patterns of **NCD-166** (a) and **NCD-167** (b) soaked in different pH aqueous solutions for 24 h.

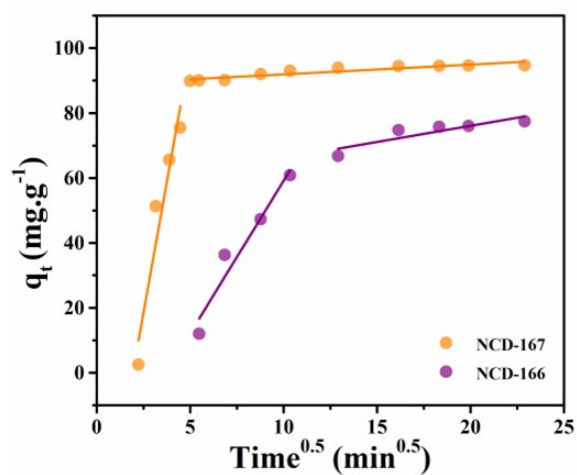

Fig. S3. The curves fitted by Weber-Morris intra-particle diffusion models for  $\text{Eu}^{3+}$  adsorption

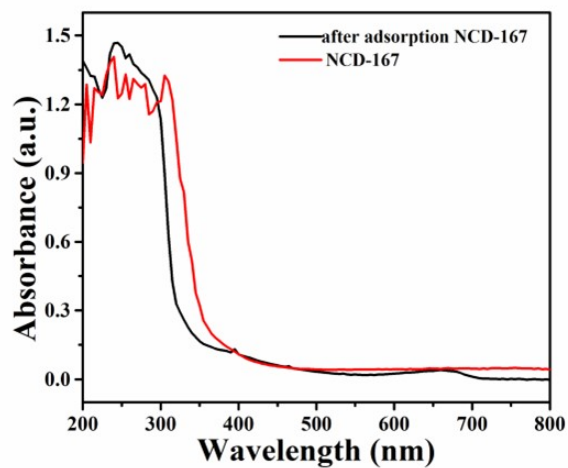

Fig. S4. Solid state UV-vis spectra of **NCD-167** before and after  $\text{Eu}^{3+}$  adsorption.

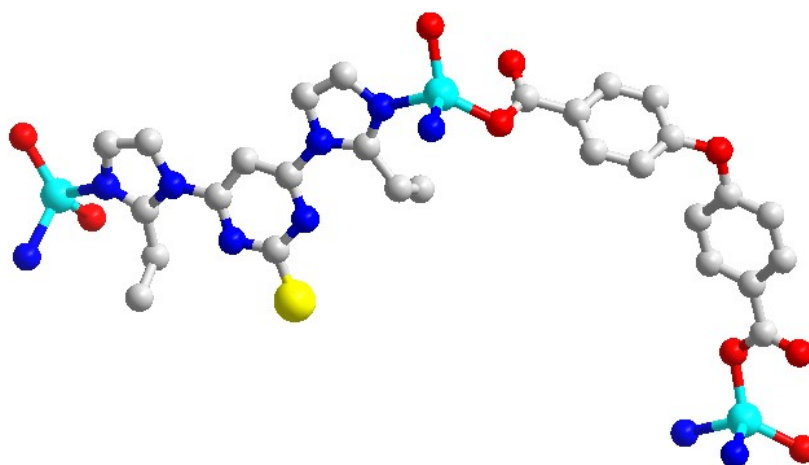

Fig. S5. The coordination environment of the organic ligands and  $\text{Zn}^{2+}$  ions of **NCD-167**.

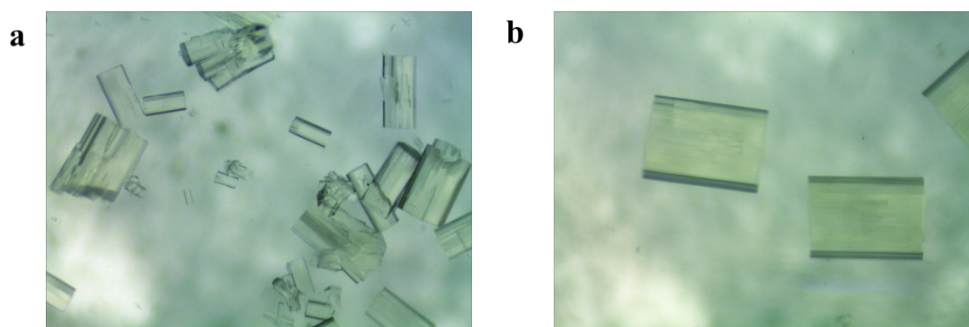

Fig. S6. Crystal photographs of NCD-166 (a) and (b) NCD-167.

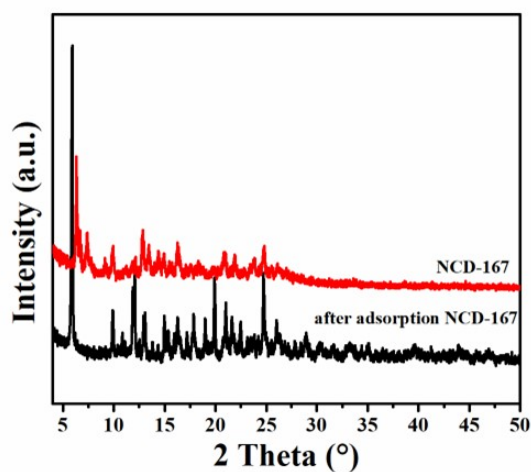

Fig. S7. PXRD pattern of NCD-167 before and after  $\text{Eu}^{3+}$  adsorption.

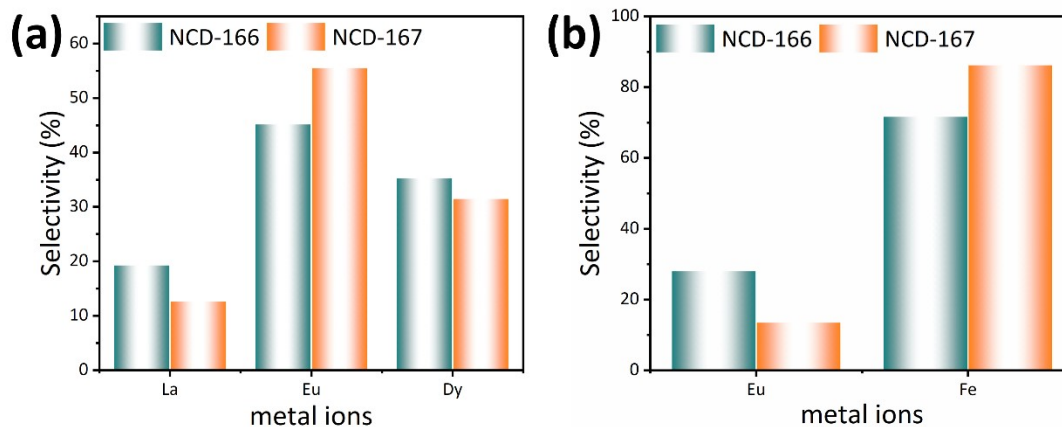

Fig. S8: (a) The recycling performance of NCD-166 and NCD-167; (b) PXRD pattern of NCD-166 and NCD-167

before and after recycling.

Table S1. Crystal Data and Structure Refinement for NCD-166 and NCD-167

| Compound          | NCD-166                                                   | NCD-167                                                   |
|-------------------|-----------------------------------------------------------|-----------------------------------------------------------|
| Empirical formula | $\text{C}_{30}\text{H}_{26}\text{N}_6\text{O}_5\text{Zn}$ | $\text{C}_{29}\text{H}_{26}\text{N}_6\text{O}_5\text{Zn}$ |
|                   | 5                                                         |                                                           |

|                                             |                                                                  |                                                                  |
|---------------------------------------------|------------------------------------------------------------------|------------------------------------------------------------------|
| Formula weight                              | 615.94                                                           | 603.93                                                           |
| Temperature/K                               | 100.15                                                           | 100.15                                                           |
| Crystal system                              | trigonal                                                         | trigonal                                                         |
| Space group                                 | P-3                                                              | P-3                                                              |
| a/Å                                         | 26.672(5)                                                        | 26.7528(12)                                                      |
| b/Å                                         | 26.672(5)                                                        | 26.7528(12)                                                      |
| c/Å                                         | 13.683(3)                                                        | 13.4196(12)                                                      |
| $\alpha$ /°                                 | 90                                                               | 90                                                               |
| $\beta$ /°                                  | 90                                                               | 90                                                               |
| $\gamma$ /°                                 | 120                                                              | 120                                                              |
| Volume/Å <sup>3</sup>                       | 8430(4)                                                          | 8317.8(11)                                                       |
| Z                                           | 6                                                                | 6                                                                |
| $\rho_{\text{calc}}$ /g/cm <sup>3</sup>     | 0.728                                                            | 0.723                                                            |
| $\mu$ /mm <sup>-1</sup>                     | 0.463                                                            | 0.468                                                            |
| F(000)                                      | 1908                                                             | 1872                                                             |
| Crystal size/mm <sup>3</sup>                | 0.12 × 0.09 × 0.04                                               | 0.09 × 0.05 × 0.09                                               |
| Radiation                                   | MoK $\alpha$ ( $\lambda$ = 0.71073)                              | MoK $\alpha$ ( $\lambda$ = 0.71073)                              |
| 2 $\theta$ range for data collection/°      | 4.264 to 50.002                                                  | 1.758 to 50.02                                                   |
| Index ranges                                | -31 ≤ h ≤ 31,<br>-30 ≤ k ≤ 31,<br>-14 ≤ l ≤ 16                   | -30 ≤ h ≤ 31,<br>-27 ≤ k ≤ 31,<br>-12 ≤ l ≤ 15                   |
| Reflections collected                       | 41766                                                            | 43031                                                            |
| Independent reflections                     | 9930 [R <sub>int</sub> = 0.1619,<br>R <sub>sigma</sub> = 0.1227] | 9782 [R <sub>int</sub> = 0.0834,<br>R <sub>sigma</sub> = 0.0755] |
| Data/restraints/parameters                  | 9930/20/387                                                      | 9782/14/378                                                      |
| Goodness-of-fit on F <sup>2</sup>           | 1.053                                                            | 1.041                                                            |
| Final R indexes [I ≥ 2 $\sigma$ (I)]        | R <sub>1</sub> = 0.0786,<br>wR <sub>2</sub> = 0.2153             | R <sub>1</sub> = 0.0567,<br>wR <sub>2</sub> = 0.1775             |
| Final R indexes [all data]                  | R <sub>1</sub> = 0.1325,<br>wR <sub>2</sub> = 0.2725             | R <sub>1</sub> = 0.0860,<br>wR <sub>2</sub> = 0.2004             |
| Largest diff. peak/hole / e Å <sup>-3</sup> | 0.95/-0.59                                                       | 0.49/-0.39                                                       |

**Table S2.** Comparison of adsorption capacity of different adsorbents for Eu<sup>3+</sup>

|                                         | Material                                                         | Temperature (K) | pH       | Adsorption Capacity (mg g <sup>-1</sup> ) | Reference        |
|-----------------------------------------|------------------------------------------------------------------|-----------------|----------|-------------------------------------------|------------------|
| Functionalized MOFs                     | UiO-66                                                           | 298             | 4        | 43                                        | 3                |
|                                         | UiO-66-COOH                                                      | 298             | 4        | 80                                        |                  |
|                                         | UiO-66-2COOH                                                     | 298             | 4        | 150                                       |                  |
|                                         | Fe <sub>3</sub> O <sub>4</sub> @ZIF-8                            | 298             | 5        | 255.6                                     | 4                |
|                                         | Cr-MIL-PMIDA                                                     | 298             | 5.5      | 85                                        | 5                |
|                                         | Cr-MIL-NH <sub>2</sub>                                           | 298             | 5.5      | 12.5                                      |                  |
|                                         | UiO-66-CN                                                        | 298             |          | 147.1                                     | 6                |
|                                         | UiO-66-AO                                                        | 298             |          | 253.8                                     |                  |
|                                         | Co-MOF                                                           | 298             | 5        | 52.93                                     | 7                |
|                                         | CMPO@MIL-101(Cr)                                                 | 298             | 5        | 12.5                                      | 8                |
| UiO-66-NH <sub>2</sub> @ZIF-8           | 298                                                              | 5               | 295.28   | 9                                         |                  |
| Zn-BDC MOF/GO                           | 298                                                              | 4               | 39.01    | 24                                        |                  |
| Nanotubes                               | CMC/MMWCNTs                                                      | 298             | 6        | 51                                        | 10               |
|                                         | Titanate nanotubes                                               | 298             |          | 18.8                                      | 11               |
|                                         | Humic acid-MWCNT hybrid                                          | 298             | 4.3      | 2.6                                       | 12               |
|                                         | Multiwall carbon nanotube                                        | 298             | 4.3      | 1.4                                       |                  |
|                                         | MWCNT/Fe <sub>3</sub> O <sub>4</sub>                             | 298             | 4.5      | 9.1                                       | 13               |
|                                         | H-Titanates nanotubes short                                      | 298             | 4        | 22.8                                      | 14               |
|                                         | H-Titanates nanotubes long                                       | 298             | 4        | 9.8                                       |                  |
| TNTs                                    | 293                                                              | 4.5             | 48.3     | 15                                        |                  |
| Biological composite                    | bio-PDA                                                          | 298             | 6.5      | 151.52                                    | 16               |
| Metal oxide                             | [Me <sub>2</sub> NH <sub>2</sub> ] V <sub>3</sub> O <sub>7</sub> |                 |          | 161.4                                     | 17               |
| Molecular sieve                         | Molecular sieve (OMS-2)                                          | 298             | 5        | 106                                       | 18               |
| Thiostannate                            | layered thiostannate                                             |                 |          | 139                                       | 19               |
| Ti <sub>3</sub> C <sub>2</sub> Tx MXene | Ti <sub>3</sub> C <sub>2</sub> Tx MXene (TCCH)                   | 298             | 5        | 97.1                                      | 20               |
| Graphene oxide (GO)                     | AO/mGO composites                                                | 293             | 4        | 69                                        | 21               |
|                                         | MnO <sub>2</sub> /graphene oxide                                 | 298             | 5        | 83.5                                      | 22               |
|                                         | graphene oxide                                                   | 298             | 5        | 68.4                                      |                  |
| Clay                                    | palygorskite                                                     | 298             | 4        | 46.75                                     | 23               |
| <b>MONTs</b>                            | <b>NCD-167</b>                                                   | <b>298</b>      | <b>5</b> | <b>150.90</b>                             | <b>This work</b> |

**Table S3.** The fitting results by the Weber-Morris intra-particle diffusion model of Eu<sup>3+</sup> onto **NCD-167**

| Material | Weber-Morris intra-particle diffusion model             |                |                                                          |                |
|----------|---------------------------------------------------------|----------------|----------------------------------------------------------|----------------|
|          | k <sub>I</sub> (mg g <sup>-1</sup> min <sup>0.5</sup> ) | R <sup>2</sup> | k <sub>II</sub> (mg g <sup>-1</sup> min <sup>0.5</sup> ) | R <sup>2</sup> |
| NCD-166  | 9.41                                                    | 0.92           | 0.99                                                     | 0.72           |

|         |       |      |      |      |
|---------|-------|------|------|------|
| NCD-167 | 32.30 | 0.89 | 0.30 | 0.85 |
|---------|-------|------|------|------|

## References

- O. V. Dolomanov, L. J. Bourhis, R. J. Gildea, J. A. K. Howard, and H. J. Puschmann, *Appl. Crystallogr.* **2009**, *42*, 339–341.
- Spek, A. *Acta Crystallogr. Section C* **2015**, *71*, 9–18.
- Zhao, B.; Yuan, L.; Wang, Y.; Duan, T.; Shi, W. Carboxylated UiO-66 Tailored for U(VI) and Eu(III) Trapping: From Batch Adsorption to Dynamic Column Separation. *ACS Appl. Mater. Inter.* **2021**, *13* (14), 16300-16308.
- Wu, Y.; Li, B.; Wang, X.; Yu, S.; Pang, H.; Liu, Y.; Liu, X.; Wang, X. Magnetic metal-organic frameworks (Fe<sub>3</sub>O<sub>4</sub>@ZIF-8) composites for U(VI) and Eu(III) elimination: simultaneously achieve favorable stability and functionality. *Chem. Eng. J.* **2019**, *378*, 122105.
- Sinha, S.; De, S.; Mishra, D.; Shekhar, S.; Agarwal, A.; Sahu, K. K. Phosphonomethyl iminodiacetic acid functionalized metal organic framework supported PAN composite beads for selective removal of La(III) from wastewater: Adsorptive performance and column separation studies. *J. Hazard. Mater.* **2022**, *425*, 127802.
- Wu, Y.; Li, B.; Wang, X.; Yu, S.; Liu, Y.; Pang, H.; Wang, H.; Chen, J.; Wang, X. Determination of practical application potential of highly stable UiO-66-AO in Eu(III) elimination investigated by macroscopic and spectroscopic techniques. *Chem. Eng. J.* **2019**, *365*, 249-258.
- Khalil, M.; Shehata, M. M.; Ghazy, O.; Waly, S. A.; Ali, Z. I. Synthesis, characterization and  $\gamma$ -rays irradiation of cobalt-based metal-organic framework for adsorption of Ce(III) and Eu(III) from aqueous solution. *Radiat. Phys. Chem.* **2022**, *190*, 109811.
- Fonseka, C.; Ryu, S.; Choo, Y.; Mullett, M.; Thiruvenkatachari, R.; Naidu, G.; Vigneswaran, S. Selective Recovery of Rare Earth Elements from Mine Ore by Cr-MIL Metal–Organic Frameworks. *ACS Sustainable Chem. Eng.* **2021**, *9* (50), 16896-16904
- Zhang, M.; Yang, K.; Cui, J.; Yu, H.; Wang, Y.; Shan, W.; Lou, Z.; Xiong, Y. 3D-agaric like core-shell architecture UiO-66-NH<sub>2</sub>@ZIF-8 with robust stability for highly efficient REEs recovery. *Chem. Eng. J.* **2020**, *386*, 124023.
- Zong, P.; Cao, D.; Cheng, Y.; Wang, S.; Hayat, T.; Alharbi, N. S.; Guo, Z.; Zhao, Y.; He, C. Enhanced performance for Eu(III) ion remediation using magnetic multiwalled carbon nanotubes functionalized with carboxymethyl cellulose nanoparticles synthesized by plasma technology. *Inorg. Chem. Front.* **2018**, *5* (12), 3184-3196.
- Sheng, G.; Dong, H.; Shen, R.; Li, Y. Microscopic insights into the temperature-dependent adsorption of Eu(III) onto titanate nanotubes studied by FTIR, XPS, XAFS and batch technique. *Chem. Eng. J.* **2013**, *217*, 486-494.
- El-Sweify, F. H.; Abdelmonem, I. M.; El-Masry, A. M.; Siyam, T. E.; Abo-Zahra, S. F. Adsorption Behavior of Co(II) and Eu(III) on Polyacrylamide/Multiwalled Carbon Nanotube Composites. *Radiochemistry* **2019**, *61* (3), 323-330.
- Chen, C. L.; Wang, X. K.; Nagatsu, M. Europium Adsorption on Multiwall Carbon Nanotube/Iron Oxide Magnetic Composite in the Presence of Polyacrylic Acid. *Environ. Sci. Technol.* **2009**, *43*, 2362–2367.
- Petrov, V.; Chen, Z.; Romanchuk, A.; Demina, V.; Tang, Y.; Kalmykov, S. Sorption of Eu (III) onto Nano-Sized H-Titanates of Different Structures. *Appl. Sci.* **2019**, *9* (4), 697.
- Lu, S.; Ma, B.; Wu, S.; Zhou, J.; Wang, X. Comparison sorption properties of Eu(III) on titanate nanotubes and rutile studied by batch technique. *J. Radioanal. Nucl. Chem.* **2015**, *306* (2), 527-534.
- Zhou, X.; Liu, W.; Tian, C.; Mo, S.; Liu, X.; Deng, H.; Lin, Z. Mussel-inspired functionalization of biological calcium carbonate for improving Eu(III) adsorption and the related mechanisms. *Chem. Eng. J.* **2018**, *351*, 816-824.
- Sun, H.; Liu, Y.; Lin, J.; Yue, Z.; Li, W.; Jin, J.; Sun, Q.; Ai, Y.; Feng, M.; Huang, X. Highly Selective Recovery of Lanthanides by Using a Layered Vanadate with Acid and Radiation Resistance. *Angew. Chem. Int. Ed.* **2020**, *59* (5),



1878-1883.

18. Yin, L.; Hu, B.; Zhuang, L.; Fu, D.; Li, J.; Hayat, T.; Alsaedi, A.; Wang, X. Synthesis of flexible cross-linked cryptomelane-type manganese oxide nanowire membranes and their application for U(VI) and Eu(III) elimination from solutions. *Chem. Eng. J.* **2020**, *381*, 122744.
19. Qi, X. H.; Du, K. Z.; Feng, M. L.; Gao, Y. J.; Huang, X. Y.; Kanatzidis, M. G. Layered  $A_2Sn_3S_7 \cdot 1.25H_2O$  (A = Organic Cation) as Efficient Ion-Exchanger for Rare Earth Element Recovery. *J. Am. Chem. Soc.* **2017**, *139* (12), 4314-4317.
20. Zhang, P.; Wang, L.; Du, K.; Wang, S.; Huang, Z.; Yuan, L.; Li, Z.; Wang, H.; Zheng, L.; Chai, Z.; Shi, W. Effective removal of U(VI) and Eu(III) by carboxyl functionalized MXene nanosheets. *J. Hazard. Mater.* **2020**, *396*, 122731.
21. Hu, B.; Guo, X.; Zheng, C.; Song, G.; Chen, D.; Zhu, Y.; Song, X.; Sun, Y. Plasma-enhanced amidoxime/magnetic graphene oxide for efficient enrichment of U(VI) investigated by EXAFS and modeling techniques. *Chem. Eng. J.* **2019**, *357*, 66-74.
22. Ma, J.; Zhao, Q.; Zhou, L.; Wen, T.; Wang, J. Mutual effects of U(VI) and Eu(III) immobilization on interpenetrating 3-dimensional  $MnO_2$ /graphene oxide composites. *Sci. Total Environ.* **2019**, *695*, 133696.
23. Zhu, Y.; Chen, T.; Liu, H.; Xu, B.; Xie, J. Kinetics and thermodynamics of Eu(III) and U(VI) adsorption onto palygorskite. *J. Mol. Liq.* **2016**, *219*, 272-278.
24. Chen, Z.; Li, Z.; Chen, J.; Tan, H.; Wu, J.; Qiu, H. Selective Adsorption of Rare Earth Elements by Zn-BDC MOF/Graphene Oxide Nanocomposites Synthesized via In Situ Interlayer-Confined Strategy. *Ind. Eng. Chem. Res.* **2022**, *61* (4), 1841-1849.
